# Supplementary material for: A Novel Aeromonas popoffii Phage AerP_220 Proposed to Be a Member of a New Tolavirus Genus in the Autographiviridae Family
Source: MDPI journal article supplement (doi:10.3390/v14122733), 2022-12-07
Supplement: s1 [file s1]

**Table S2. A list of Aeromonas phages available in the NCBI GenBank database**

| No | Bacterial host       | Prototype phage               | NCBI Genome ID | Family            | Subfamily       | Genus                          |
|----|----------------------|-------------------------------|----------------|-------------------|-----------------|--------------------------------|
| 1  | <i>A. dhakensis</i>  | Aeromonas phage P19           | OM339718       | Straboviridae     | Emmerichvirinae | Ceceduovirus                   |
| 2  | <i>A. hydrophila</i> | Aeromonas phage MJG           | MK455769       | Autographiviridae | Colwellvirinae  | unclassified Uliginivirus      |
| 3  | <i>A. hydrophila</i> | Aeromonas phage HJG           | MK455770       | Autographiviridae | Colwellvirinae  | unclassified Uliginivirus      |
| 4  | <i>A. hydrophila</i> | Aeromonas phage ZPAH7         | MH992513       | Autographiviridae | Melnykvirinae   | Aerosvirus                     |
| 5  | <i>A. hydrophila</i> | Aeromonas phage ZPAH7B        | MK330684       | Autographiviridae | Melnykvirinae   | Aerosvirus                     |
| 6  | <i>A. hydrophila</i> | Aeromonas phage 25AhydR2PP    | NC_047966      | Autographiviridae | Melnykvirinae   | Aerosvirus                     |
| 7  | <i>A. hydrophila</i> | Aeromonas phage Ahp1          | NC_047866      | Autographiviridae | Melnykvirinae   | Ahphunavirus                   |
| 8  | <i>A. hydrophila</i> | Aeromonas phage CF7           | NC_047865      | Autographiviridae | Melnykvirinae   | Ahphunavirus                   |
| 9  | <i>A. hydrophila</i> | Aeromonas phage LAh1          | MK838107       | Autographiviridae | Melnykvirinae   | unclassified Ahphunavirus      |
| 10 | <i>A. hydrophila</i> | Aeromonas phage LAh2          | MK838108       | Autographiviridae | Melnykvirinae   | unclassified Ahphunavirus      |
| 11 | <i>A. hydrophila</i> | Aeromonas phage LAh3          | MK838109       | Autographiviridae | Melnykvirinae   | unclassified Ahphunavirus      |
| 12 | <i>A. hydrophila</i> | Aeromonas phage LAh4          | MK838110       | Autographiviridae | Melnykvirinae   | unclassified Ahphunavirus      |
| 13 | <i>A. hydrophila</i> | Aeromonas phage LAh5          | MK838111       | Autographiviridae | Melnykvirinae   | unclassified Ahphunavirus      |
| 14 | <i>A. hydrophila</i> | Aeromonas phage PZL-Ah8       | MZ851152       | Autographiviridae | Studiervirinae  | unclassified                   |
| 15 | <i>A. hydrophila</i> | Aeromonas phage PZL-Ah1       | MT681669       | Autographiviridae | Studiervirinae  | Teseptimavirus                 |
| 16 | <i>A. hydrophila</i> | Aeromonas phage PZL-Ah152     | MW671054       | Autographiviridae | Studiervirinae  | unclassified                   |
| 17 | <i>A. hydrophila</i> | Aeromonas phage LAh_7         | NC_052985      | Casjensviridae    | -               | Sharonstreetvirus              |
| 18 | <i>A. hydrophila</i> | Aeromonas phage vB_AhyS-A18P4 | NC_052984      | Casjensviridae    | -               | Sharonstreetvirus              |
| 19 | <i>A. hydrophila</i> | Aeromonas phage BUCT551       | NC_052986      | Casjensviridae    | -               | Sharonstreetvirus              |
| 20 | <i>A. hydrophila</i> | Aeromonas phage AhMtk13b      | OL840901       | Casjensviridae    | -               | unclassified Sharonstreetvirus |
| 21 | <i>A. hydrophila</i> | Aeromonas phage pAh6-C        | NC_048774      | Chaseviridae      | Nefertitvirinae | Pahsextavirus                  |
| 22 | <i>A. hydrophila</i> | Aeromonas phage pAh6.2TG      | MZ336020       | Chaseviridae      | Nefertitvirinae | unclassified Pahsextavirus     |
| 23 | <i>A. hydrophila</i> | Aeromonas phage PVN02         | MT623578       | Chaseviridae      | Nefertitvirinae | unclassified Pahsextavirus     |
| 24 | <i>A. hydrophila</i> | Aeromonas phage PVN03         | MW380983       | Chaseviridae      | Nefertitvirinae | unclassified Pahsextavirus     |
| 25 | <i>A. hydrophila</i> | Aeromonas phage PVN04         | MW380984       | Chaseviridae      | Nefertitvirinae | unclassified Pahsextavirus     |
| 26 | <i>A. hydrophila</i> | Aeromonas phage PVN05         | MW380985       | Chaseviridae      | Nefertitvirinae | unclassified Pahsextavirus     |
| 27 | <i>A. hydrophila</i> | Aeromonas phage ZPAH14        | OM810291       | Chaseviridae      | Nefertitvirinae | unclassified Pahsextavirus     |
| 28 | <i>A. hydrophila</i> | Aeromonas phage AhSzw-1       | NC_047950      | Demerecviridae    | -               | Shenzhenvirus                  |
| 29 | <i>A. hydrophila</i> | Aeromonas phage AhSzq-1       | NC_047949      | Demerecviridae    | -               | Shenzhenvirus                  |

|    |                           |                                      |                 |                            |                 |                               |
|----|---------------------------|--------------------------------------|-----------------|----------------------------|-----------------|-------------------------------|
| 30 | <i>A. hydrophila</i>      | Aeromonas phage Akh-2                | MK318083        | Demerecviridae             | -               | unclassified<br>Shenzhenvirus |
| 31 | <i>A. hydrophila</i>      | Aeromonas phage CC2                  | NC_019538       | Straboviridae              | Emmerichvirinae | Ceceduovirus                  |
| 32 | <i>A. hydrophila</i>      | Aeromonas phage AP1                  | MT713136        | Straboviridae              | Emmerichvirinae | unclassified<br>Ceceduovirus  |
| 33 | <i>A. hydrophila</i>      | Aeromonas phage<br>ZPAH1             | MW272540        | Straboviridae              | Emmerichvirinae | unclassified<br>Ishigurovirus |
| 34 | <i>A. hydrophila</i>      | Aeromonas phage Aeh1                 | NC_005260       | Straboviridae              | -               | Cinqassovirus                 |
| 35 | <i>A. hydrophila</i>      | Aeromonas phage Ah1                  | NC_055733       | Straboviridae              | -               | Cinqassovirus                 |
| 36 | <i>A. hydrophila</i>      | Aeromonas phage<br>50AhydR13PP       | NC_055746       | Straboviridae              | -               | Tulanevirus                   |
| 37 | <i>A. hydrophila</i>      | Aeromonas phage<br>AhMtk13a          | OL840900        | Straboviridae              | -               | Tulanevirus                   |
| 38 | <i>A. hydrophila</i>      | Aeromonas phage<br>60AhydR15PP       | NC_055747       | Straboviridae              | -               | Tulanevirus                   |
| 39 | <i>A. hydrophila</i>      | Aeromonas phage<br>Ahp2R             | KX455876        | unclassified<br>Myoviridae | unclassified    | unclassified                  |
| 40 | <i>A. hydrophila</i>      | Aeromonas phage<br>4_4572            | NC_048773       | unclassified               | unclassified    | Lahexavirus                   |
| 41 | <i>A. hydrophila</i>      | Aeromonas phage<br>LAh_6             | NC_048774       | unclassified               | unclassified    | Lahexavirus                   |
| 42 | <i>A. hydrophila</i>      | Aeromonas phage<br>LAh_8             | NC_048775       | unclassified               | unclassified    | Lahexavirus                   |
| 43 | <i>A. hydrophila</i>      | Aeromonas phage LAh9                 | NC_048776       | unclassified               | unclassified    | Lahexavirus                   |
| 44 | <i>A. hydrophila</i>      | Aeromonas phage D3                   | MN102098        | unclassified<br>Myoviridae | unclassified    | unclassified                  |
| 45 | <i>A. hydrophila</i>      | Aeromonas phage D6                   | MN131137        | unclassified<br>Myoviridae | unclassified    | unclassified                  |
| 46 | <i>A. hydrophila</i>      | Aeromonas phage<br>LAh10             | MK838116        | unclassified<br>Myoviridae | unclassified    | unclassified                  |
| 47 | <i>A. hydrophila</i>      | Aeromonas phage CF8                  | MK774614        | unclassified<br>Myoviridae | unclassified    | unclassified                  |
| 48 | <i>A. hydrophila</i>      | Aeromonas phage PS1                  | MN032614        | unclassified<br>Myoviridae | unclassified    | unclassified                  |
| 49 | <i>A. hydrophila</i>      | Aeromonas phage PS2                  | MN453779        | unclassified<br>Myoviridae | unclassified    | unclassified                  |
| 50 | <i>A. hydrophila</i>      | Aeromonas phage<br>4L372D            | NC_048771       | unclassified               | unclassified    | Plateaulakevirus              |
| 51 | <i>A. hydrophila</i>      | Aeromonas phage<br>4_L372XY          | NC_048772       | unclassified               | unclassified    | Plateaulakevirus              |
| 52 | <i>A. media</i>           | Aeromonas phage<br>phiO18P           | NC_009542       | Peduoviridae               | -               | Bielevirus                    |
| 53 | <b><i>A. popoffii</i></b> | <b>Aeromonas phage<br/>AerP_220*</b> | <b>ON624112</b> | <b>Autographiviridae</b>   | -               | -                             |
| 54 | <i>A. rivipollensis</i>   | Aeromonas phage<br>2_D05             | NC_054465       | unclassified               | unclassified    | Kunmingvirus                  |
| 55 | <i>A. rivipollensis</i>   | Aeromonas phage<br>4_D05             | NC_054466       | unclassified               | unclassified    | Kunmingvirus                  |
| 56 | <i>A. salmonicida</i>     | Aeromonas phage<br>phiAS7            | NC_019528       | Autographiviridae          | Melnykvirinae   | Aerosvirus                    |
| 57 | <i>A. salmonicida</i>     | Aeromonas phage T7-Ah                | MT740748        | Autographiviridae          | Studiervirinae  | unclassified                  |
| 58 | <i>A. salmonicida</i>     | Aeromonas phage AS-<br>sw            | NC_048674       | Straboviridae              | Emmerichvirinae | Ceceduovirus                  |
| 59 | <i>A. salmonicida</i>     | Aeromonas phage AS-zj                | NC_048673       | Straboviridae              | Emmerichvirinae | Ceceduovirus                  |

|    |                       |                              |            |                         |                 |                                |
|----|-----------------------|------------------------------|------------|-------------------------|-----------------|--------------------------------|
| 60 | <i>A. salmonicida</i> | Aeromonas phage AS-szw       | MF498773   | Straboviridae           | Emmerichvirinae | Ceceduovirus                   |
| 61 | <i>A. salmonicida</i> | Aeromonas phage AS-yj        | MF498774   | Straboviridae           | Emmerichvirinae | Ceceduovirus                   |
| 62 | <i>A. salmonicida</i> | Aeromonas phage 65           | NC_015251  | Straboviridae           | Emmerichvirinae | Ishiguvirus                    |
| 63 | <i>A. salmonicida</i> | Aeromonas phage PX29         | NC_023688  | Straboviridae           | -               | Angelvirus                     |
| 64 | <i>A. salmonicida</i> | Aeromonas phage 31           | NC_007022  | Straboviridae           | -               | Biquartavirus                  |
| 65 | <i>A. salmonicida</i> | Aeromonas phage 44RR2.8t     | NC_005135  | Straboviridae           | -               | Biquartavirus                  |
| 66 | <i>A. salmonicida</i> | Aeromonas phage L9-6         | KY290956.1 | Straboviridae           | -               | Unclassified Biquartavirus     |
| 67 | <i>A. salmonicida</i> | Aeromonas phage Riv-10       | KY290957   | Straboviridae           | -               | Unclassified Biquartavirus     |
| 68 | <i>A. salmonicida</i> | Aeromonas phage SW69-9       | KY290958   | Straboviridae           | -               | Unclassified Biquartavirus     |
| 69 | <i>A. salmonicida</i> | Aeromonas phage phiAS5       | NC_014636  | Straboviridae           | -               | Chrysonvirus                   |
| 70 | <i>A. salmonicida</i> | Aeromonas phage 25           | NC_008208  | Straboviridae           | -               | Tulanevirus                    |
| 71 | <i>A. salmonicida</i> | Aeromonas phage phiAS4       | NC_014635  | Straboviridae           | -               | Tulanevirus                    |
| 72 | <i>A. salmonicida</i> | Aeromonas phage AS-gz        | NC_042019  | Straboviridae           | -               | Tulanevirus                    |
| 73 | <i>A. salmonicida</i> | Aeromonas phage vB_AsM_ZHF   | MW584871   | Straboviridae           | -               | Tulanevirus                    |
| 74 | <i>A. salmonicida</i> | Aeromonas phage Aes508       | NC_019543  | Straboviridae           | -               | Tulanevirus                    |
| 75 | <i>A. salmonicida</i> | Aeromonas phage Asp37        | KY290949   | unclassified Myoviridae | unclassified    | unclassified                   |
| 76 | <i>A. salmonicida</i> | Aeromonas phage 51           | KY290953   | unclassified            | unclassified    | Popoffvirus                    |
| 77 | <i>A. salmonicida</i> | Aeromonas phage vB_AsaM-56   | NC_019527  | unclassified            | unclassified    | Popoffvirus                    |
| 78 | <i>A. salmonicida</i> | Aeromonas phage PS           | MT259468   | Autographiviridae       | unclassified    | unclassified                   |
| 79 | <i>Aeromonas</i> sp.  | Aeromonas phage phiA8-29     | NC_048660  | Ackermannviridae        | -               | Tedavirus                      |
| 80 | <i>Aeromonas</i> spp. | Aeromonas phage Atoyac1      | MT682386   | Autographiviridae       | Melnykvirinae   | unclassified                   |
| 81 | <i>Aeromonas</i> spp. | Aeromonas phage Atoyac10     | MT682387   | Autographiviridae       | Melnykvirinae   | unclassified                   |
| 82 | <i>Aeromonas</i> spp. | Aeromonas phage Atoyac13     | MT682388   | Autographiviridae       | Melnykvirinae   | unclassified                   |
| 83 | <i>Aeromonas</i> spp. | Aeromonas phage Atoyac14     | MT682389   | Autographiviridae       | Melnykvirinae   | unclassified                   |
| 84 | <i>Aeromonas</i> spp. | Aeromonas phage Atoyac15     | MT682390   | Autographiviridae       | Melnykvirinae   | unclassified                   |
| 85 | <i>Aeromonas</i> spp. | Aeromonas phage Atoyac23     | MT682391   | Autographiviridae       | Melnykvirinae   | unclassified                   |
| 86 | <i>Aeromonas</i> sp.  | Aeromonas phage vB_AspA_Tola | OM913599   | Autographiviridae       | unclassified    | unclassified                   |
| 87 | <i>Aeromonas</i> sp.  | Aeromonas phage Bolek        | OM913597   | Autographiviridae       | unclassified    | unclassified                   |
| 88 | <i>Aeromonas</i> sp.  | Aeromonas phage Lolek        | OM913598   | Autographiviridae       | unclassified    | unclassified                   |
| 89 | <i>Aeromonas</i> sp.  | Aeromonas phage pAEv1812     | OL964754   | Casjensviridae          | -               | unclassified Sharonstreetvirus |

|    |                      |                          |           |                              |                     |                               |
|----|----------------------|--------------------------|-----------|------------------------------|---------------------|-------------------------------|
| 90 | <i>Aeromonas</i> sp. | Aeromonas phage Aes012   | NC_020879 | Straboviridae                | -                   | Tulanevirus                   |
| 91 | <i>Aeromonas</i> sp. | Aeromonas phage pIS4-A   | NC_042037 | -                            | Brucestockervirinae | Roufvirus                     |
| 92 | <i>Aeromonas</i> sp. | Aeromonas phage pAEv1818 | OL964755  | unclassified<br>Siphoviridae | unclassified        | unclassified                  |
| 93 | <i>A.veronii</i>     | Aeromonas phage BUCT695  | OL799327  | unclassified<br>Podoviridae  | unclassified        | unclassified                  |
| 94 | <i>A. veronii</i>    | Aeromonas phage BUCT696  | OL770365  | Chaseviridae                 | Nefertitvirinae     | unclassified<br>Pahsextavirus |

\*the investigated phage AerP\_220
